# Supplementary material for: Nocturnal spawning as a way to avoid egg exposure to diurnal predators
Source: PubMed Central journal article supplement (PMC6193928; doi:10.1038/s41598-018-33615-4), 2018-10-18
Supplement: 41598_2018_33615_MOESM1_ESM.pdf [file 41598_2018_33615_MOESM1_ESM.pdf]

## Nocturnal spawning as a way to avoid egg exposure to diurnal predators

Marek Šmejkal<sup>a,b\*</sup>, Allan T. Souza<sup>a</sup>, Petr Blabolil<sup>a,b</sup>, Daniel Bartoň<sup>a</sup>, Zuzana Sajdlová<sup>a</sup>, Lukáš Vejřík<sup>a,b</sup>, Jan Kubečka<sup>a</sup>

<sup>a</sup> Biology Centre of the Czech Academy of Sciences, Institute of Hydrobiology, České Budějovice, Czech Republic

<sup>b</sup> Biology Centre of the Czech Academy of Sciences, SOWA, České Budějovice, Czech Republic

\* Corresponding author: mareks1@centrum.cz

**Supplementary material 1:** Fish were observed during the spawning period in a defined part of the spawning ground with size 20 \* 4 m. Basic characteristics of the spawning shoal size and spawning frequency were recorded by five observers. Ranges of number of fish/ spawning events per 30 minutes observation period during the day and night are presented. Initials of observers: MŠ – Marek Šmejkal, DB – Daniel Bartoň, TK – Tomáš Kolařík, ZŠ – Zuzana Šmejkalová, KM – Karlos Ribeiro de Moraes

| Observer | No. of observations | Day         |                                 | Night       |                                 |
|----------|---------------------|-------------|---------------------------------|-------------|---------------------------------|
|          |                     | No. of fish | No. of spawning events / 30 min | No. of fish | No. of spawning events / 30 min |
| MŠ       | 15                  | 1 - 8       | 0 - 2                           | 30 - 50     | 15 - 60                         |
| DB       | 10                  | 0 - 5       | 0 - 1                           | 0 - 50      | 0 - 30                          |
| TK       | 6                   | 0 - 8       | 3 - 10                          | 10 - 45     | 15 - 30                         |
| ZŠ       | 4                   | 0 - 5       | -                               | 20 - 40     | -                               |
| KM       | 2                   | 10 - 15     | -                               | 20 - 25     | -                               |
